# Supplementary material for: Longitudinal Serum Metabolomics in Extremely Premature Infants: Relationships With Gestational Age, Nutrition, and Morbidities
Source: Front Neurosci. 2022 Feb 17;16:830884. doi: 10.3389/fnins.2022.830884 (PMC8891494; doi:10.3389/fnins.2022.830884)
Supplement: Supplementary file 1 [file Table_1.xlsx]

## Sheet: Table S1 
Table S1. List of analyzed metabolites.
Metabolite	HMDB	HMDB class	HMDB sub-class	HMDB direct parent
3-Hydroxybutyric acid	HMDB0000357	Hydroxy acids and derivatives	Beta hydroxy acids and derivatives	Beta hydroxy acids and derivatives
(S)-3-Hydroxyisobutyric acid	HMDB0000023	Hydroxy acids and derivatives	Beta hydroxy acids and derivatives	Beta hydroxy acids and derivatives
Acetic acid	HMDB0000042	Carboxylic acids and derivatives	Carboxylic acids	Carboxylic acids
Acetoacetic acid	HMDB0000060	Keto acids and derivatives	Short-chain keto acids and derivatives	Short-chain keto acids and derivatives
Acetone	HMDB0001659	Organooxygen compounds	Carbonyl compounds	Ketones
L-Alanine	HMDB0000161	Carboxylic acids and derivatives	Amino acids, peptides, and analogues	Alanine and derivatives
L-Asparagine	HMDB0000168	Carboxylic acids and derivatives	Amino acids, peptides, and analogues	Asparagine and derivatives
Betaine	HMDB0000043	Carboxylic acids and derivatives	Amino acids, peptides, and analogues	Alpha amino acids
Choline	HMDB0000097	Organonitrogen compounds	Quaternary ammonium salts	Cholines
Citric acid	HMDB0000094	Carboxylic acids and derivatives	Tricarboxylic acids and derivatives	Tricarboxylic acids and derivatives
Creatinine	HMDB0000562	Carboxylic acids and derivatives	Amino acids, peptides, and analogues	Alpha amino acids and derivatives
Ethanolamine	HMDB0000149	Organonitrogen compounds	Amines	1,2-aminoalcohols
Formic acid	HMDB0000142	Carboxylic acids and derivatives	Carboxylic acids	Carboxylic acids
D-Glucose	HMDB0000122	Organooxygen compounds	Carbohydrates and carbohydrate conjugates	Hexoses
L-Glutamine	HMDB0000641	Carboxylic acids and derivatives	Amino acids, peptides, and analogues	L-alpha-amino acids
Glycerol	HMDB0000131	Organooxygen compounds	Carbohydrates and carbohydrate conjugates	Sugar alcohols
L-Histidine	HMDB0000177	Carboxylic acids and derivatives	Amino acids, peptides, and analogues	Histidine and derivatives
Hypoxanthine	HMDB0000157	Imidazopyrimidines	Purines and purine derivatives	Hypoxanthines
L-Isoleucine	HMDB0000172	Carboxylic acids and derivatives	Amino acids, peptides, and analogues	Isoleucine and derivatives
L-Lactic acid	HMDB0000190	Hydroxy acids and derivatives	Alpha hydroxy acids and derivatives	Alpha hydroxy acids and derivatives
L-Leucine	HMDB0000687	Carboxylic acids and derivatives	Amino acids, peptides, and analogues	Leucine and derivatives
L-Lysine	HMDB0000182	Carboxylic acids and derivatives	Amino acids, peptides, and analogues	L-alpha-amino acids
L-Methionine	HMDB0000696	Carboxylic acids and derivatives	Amino acids, peptides, and analogues	Methionine and derivatives
Myo-Inositol	HMDB0000211	Organooxygen compounds	Alcohols and polyols	Cyclohexanols
Ornithine	HMDB0000214	Carboxylic acids and derivatives	Amino acids, peptides, and analogues	L-alpha-amino acids
L-Phenylalanine	HMDB0000159	Carboxylic acids and derivatives	Amino acids, peptides, and analogues	Phenylalanine and derivatives
L-Proline	HMDB0000162	Carboxylic acids and derivatives	Amino acids, peptides, and analogues	Proline and derivatives
L-Threonine	HMDB0000167	Carboxylic acids and derivatives	Amino acids, peptides, and analogues	L-alpha-amino acids
L-Tyrosine	HMDB0000158	Carboxylic acids and derivatives	Amino acids, peptides, and analogues	Tyrosine and derivatives
Uridine	HMDB0000296	Pyrimidine nucleosides	NA	Pyrimidine nucleosides
L-Valine	HMDB0000883	Carboxylic acids and derivatives	Amino acids, peptides, and analogues	Valine and derivatives
HMDB, Human Metabolome Database

## Sheet: Table S2
Table S2. Spearman's correlations between serum metabolites on postnatal day 1 vs. infant gestational age at birth.
Metabolite	Spearman's ρ	P	FDR adjusted P	Significant after FDR?
3-hydroxybutyrate	-0.130157	0.235117	0.404924	No
3-hydroxyisobutyrate	-0.512471	5.3347e-07	5.50767e-06	Yes
Acetate	-0.517694	3.89984e-07	6.04475e-06	Yes
Acetoacetate	-0.295781	0.00598927	0.0265239	Yes
Acetone	-0.421703	5.83223e-05	0.000451998	Yes
Alanine	-0.129952	0.235863	0.384829	No
Asparagine	-0.197158	0.0705152	0.218597	No
Betaine	-0.169184	0.12165	0.269369	No
Choline	-0.0497369	0.651239	0.696152	No
Citrate	-0.091825	0.403257	0.543521	No
Creatinine	-0.127624	0.244433	0.37887	No
Ethanolamine	-0.14923	0.172848	0.334892	No
Formate	-0.537041	1.16606e-07	3.61479e-06	Yes
Glucose	-0.336235	0.00165421	0.0102561	Yes
Glutamine	-0.0415599	0.705688	0.729211	No
Glycerol	-0.177283	0.104558	0.24933	No
Histidine	0.0619829	0.573071	0.65797	No
Hypoxanthine	0.137972	0.207944	0.379192	No
Isoleucine	-0.0847337	0.440691	0.546456	No
Lactate	-0.267239	0.0134175	0.051993	No
Leucine	-0.190624	0.0805495	0.208086	No
Lysine	-0.0835893	0.44691	0.532854	No
Methionine	-0.0108766	0.921301	0.921301	No
Myo-inositol	-0.15865	0.146997	0.303793	No
Ornithine	-0.0550385	0.616866	0.682959	No
Phenylalanine	-0.252284	0.0198422	0.0683453	No
Proline	-0.194497	0.0744722	0.209876	No
Threonine	-0.0996792	0.364061	0.512996	No
Tyrosine	-0.104677	0.340382	0.502469	No
Uridine	-0.085839	0.434731	0.561527	No
Valine	-0.318121	0.00300733	0.0155378	Yes

## Sheet: Table S3
Table S3. Levels and fold-change in mean daily metabolite levels between infants who received above or below the median energy intake as enteral energy postnatal day 1-28.
	Below median enteral energy intake PND 1-28			Above median enteral energy intake PND 1-28
Metabolite	25th perc.	50th perc.	75th perc.	25th perc.	50th perc.	75th perc.	Fold change	P, <median vs. >median*	FDR adjusted P	Significant after FDR?
3-hydroxybutyrate	3.10079e+07	3.78759e+07	4.52621e+07	2.54707e+07	3.32756e+07	4.09231e+07	0.878542	0.0389786	0.0671298	No
3-hydroxyisobutyrate	7.41914e+07	8.09273e+07	9.35667e+07	5.9361e+07	6.90659e+07	7.85534e+07	0.853432	0.000712621	0.00441825	Yes
Acetate	1.06487e+08	1.21839e+08	1.33549e+08	9.0435e+07	1.02289e+08	1.23303e+08	0.839542	0.0401298	0.0654749	No
Acetoacetate	4.08742e+07	5.62102e+07	8.35952e+07	1.78564e+07	5.46307e+07	8.01902e+07	0.9719	0.102611	0.132539	No
Acetone	3.49504e+08	4.52544e+08	6.07491e+08	2.57755e+08	3.78565e+08	5.61654e+08	0.836527	0.0699302	0.098538	No
Alanine	7.24352e+08	8.76611e+08	1.05242e+09	6.07186e+08	7.09241e+08	9.46924e+08	0.809072	0.0125426	0.0277729	Yes
Asparagine	2.39944e+07	2.87798e+07	4.03052e+07	2.0867e+07	3.29208e+07	4.43444e+07	1.14389	0.589123	0.60876	No
Betaine	7.36328e+08	9.64023e+08	1455114424	5.53973e+08	8.05367e+08	1.10084e+09	0.835424	0.0663034	0.10277	No
Choline	350234782	4.05444e+08	4.92825e+08	3.318e+08	4.55434e+08	5.43067e+08	1.1233	0.175013	0.193764	No
Citrate	1.06906e+08	1.32172e+08	1.52544e+08	1.0155e+08	1.25998e+08	1.40981e+08	0.953286	0.160235	0.183974	No
Creatinine	1.68186e+08	214176378	2.35829e+08	1.20261e+08	1.68633e+08	1.97979e+08	0.787357	0.000381284	0.00295495	Yes
Ethanolamine	4.34579e+07	6.15642e+07	8.41172e+07	3.23799e+07	4.84592e+07	7.58957e+07	0.787132	0.113122	0.134876	No
Formate	1.22982e+08	1.45788e+08	1.74014e+08	1.13085e+08	1.49472e+08	1.87865e+08	1.02527	0.407577	0.435685	No
Glucose	4.63449e+09	6333059375	8690361540	4.1049e+09	4.85654e+09	5.84657e+09	0.766855	0.000347939	0.00359537	Yes
Glutamine	1.85123e+08	2.24546e+08	2.94269e+08	1.45368e+08	1.74263e+08	2.14438e+08	0.776069	0.00516499	0.0133429	Yes
Glycerol	8.07318e+08	1.21782e+09	1.41962e+09	4.36458e+08	6.12534e+08	7.90827e+08	0.502978	5.41585e-08	1.67891e-06	Yes
Histidine	1.50591e+08	1.68189e+08	1.88144e+08	1.37331e+08	1.4796e+08	1.62012e+08	0.879726	0.00239257	0.00824107	Yes
Hypoxanthine	4.27071e+07	5.97627e+07	7.5652e+07	5.3467e+07	6.47348e+07	9.12414e+07	1.0832	0.105163	0.130402	No
Isoleucine	1.07175e+08	1.16322e+08	1.53875e+08	1.20531e+08	1.39381e+08	1.70361e+08	1.19824	0.0952495	0.12838	No
Lactate	4.208e+09	4.79098e+09	5.5501e+09	3.11043e+09	4.02994e+09	4.88772e+09	0.84115	0.00109598	0.00566258	Yes
Leucine	2.9902e+08	3.27104e+08	3.73341e+08	2.50347e+08	3.0052e+08	3.29871e+08	0.918728	0.00920028	0.0219391	Yes
Lysine	1.76881e+08	1.95712e+08	2.2273e+08	1.3796e+08	1.62653e+08	1.93402e+08	0.831082	0.00203814	0.00789781	Yes
Methionine	8.15988e+07	9.23459e+07	1.08793e+08	6.52887e+07	8.07361e+07	8.99343e+07	0.87428	0.0148307	0.0306501	Yes
Myo-inositol	1.31398e+09	1.53225e+09	2.02868e+09	1.04574e+09	1.32078e+09	1.77291e+09	0.861989	0.0255855	0.0495718	Yes
Ornithine	6.03821e+06	5.7177e+07	2.64056e+08	6.3742e+06	9.31293e+06	7.33343e+07	0.162879	0.0699302	0.10323	No
Phenylalanine	2.64626e+08	3.05368e+08	3.53095e+08	2.23585e+08	2.6613e+08	3.24329e+08	0.871505	0.0272135	0.0496246	Yes
Proline	1.64822e+08	2.17055e+08	2.54206e+08	1.36978e+08	1.71097e+08	1.90378e+08	0.788262	0.00382094	0.0107681	Yes
Threonine	1.10248e+08	1.56155e+08	1.80998e+08	4.21263e+07	7.67578e+07	1.24047e+08	0.491547	3.82034e-06	5.92153e-05	Yes
Tyrosine	2.13521e+08	3.43894e+08	5.29577e+08	3.73696e+08	4.95483e+08	5.84016e+08	1.4408	0.00269448	0.00835289	Yes
Uridine	3.4247e+07	6.93462e+07	1.11998e+08	2.55876e+07	3.86565e+07	5.73726e+07	0.557442	0.00180468	0.00799216	Yes
Valine	3.68925e+08	4.2567e+08	4.78404e+08	3.85701e+08	4.35772e+08	4.87352e+08	1.02373	0.791739	0.791739	No
* Mann-Whitney U test

## Sheet: Table S4
Table S4. Mean daily metabolite levels postnatal day 1-28 vs. ROP and BPD outcome.
Metabolite	P, No/mild ROP vs. Severe ROP*	FDR Adjusted P	Significant after FDR?	P, No BPD vs. BPD*	FDR adjusted P	Significant after FDR?
3-hydroxybutyrate	0.659783	0.705285	No	0.483709	0.714047	No
3-hydroxyisobutyrate	0.0493611	0.153019	No	0.0971718	0.602465	No
Acetate	0.0553832	0.15608	No	0.74938	0.82967	No
Acetoacetate	0.00602013	0.186624	No	0.27959	0.577819	No
Acetone	0.221921	0.382197	No	0.921698	0.952422	No
Alanine	0.108307	0.239823	No	0.313685	0.572014	No
Asparagine	0.916056	0.916056	No	0.201309	0.780073	No
Betaine	0.170612	0.33056	No	0.263524	0.680769	No
Choline	0.336538	0.434694	No	0.350408	0.60348	No
Citrate	0.423813	0.505315	No	0.499183	0.703394	No
Creatinine	0.277907	0.410244	No	0.228547	0.708497	No
Ethanolamine	0.0355652	0.137815	No	0.30782	0.596401	No
Formate	0.0637598	0.164713	No	0.649388	0.805241	No
Glucose	0.0120364	0.093282	No	0.0171421	0.531406	No
Glutamine	0.283436	0.399387	No	0.24311	0.685128	No
Glycerol	0.0164187	0.101796	No	0.104833	0.541637	No
Histidine	0.294716	0.397226	No	0.563615	0.759654	No
Hypoxanthine	0.624265	0.716749	No	0.815412	0.871647	No
Isoleucine	0.751843	0.776905	No	0.740082	0.849724	No
Lactate	0.0175646	0.0907503	No	0.030581	0.474006	No
Leucine	0.0673914	0.160702	No	0.219191	0.75499	No
Lysine	0.0479445	0.165142	No	0.941232	0.941232	No
Methionine	0.23632	0.385574	No	0.0768432	0.595535	No
Myo-inositol	0.00725991	0.112529	No	0.623092	0.804827	No
Ornithine	0.199338	0.363499	No	0.383009	0.62491	No
Phenylalanine	0.00753376	0.0778489	No	0.172619	0.764453	No
Proline	0.246279	0.381732	No	0.263524	0.628403	No
Threonine	0.108307	0.223835	No	0.417405	0.646978	No
Tyrosine	0.395645	0.490599	No	0.694188	0.827685	No
Uridine	0.0295354	0.1308	No	0.0413888	0.427684	No
Valine	0.641921	0.710699	No	0.263524	0.583517	No
* Mann-Whitney U test
BPD, bronchopulmonary dysplasia; ROP, retinopathy of prematurity.
